# Supplementary material for: Functional Linkage of RKIP to the Epithelial to Mesenchymal Transition and Autophagy during the Development of Prostate Cancer
Source: Cancers (Basel). 2018 Aug 16;10(8):273. doi: 10.3390/cancers10080273 (PMC6115972; doi:10.3390/cancers10080273)
Supplement: Supplementary file 1 [file cancers-10-00273-s001.pdf]

Table S1: Gene products in the three gene ontology terms.

| Term                                              | Gene Products                                                                                                                                                                                                                                                                                                                                                                                                                                                                                                                                                                                                                                                                                                                                                                                                         |
|---------------------------------------------------|-----------------------------------------------------------------------------------------------------------------------------------------------------------------------------------------------------------------------------------------------------------------------------------------------------------------------------------------------------------------------------------------------------------------------------------------------------------------------------------------------------------------------------------------------------------------------------------------------------------------------------------------------------------------------------------------------------------------------------------------------------------------------------------------------------------------------|
| autophagy (GO:0006914)                            | <i>ABL1, ANXA7, ARSB, BNIP1, VPS51, CLTC, CTSD, DAP, FOXO1, HMGB1, IFI16, ITGB4, RAB8A, NPC1, TBC1D25, PGA5, PGC, PIK3C3, PIK3CB, RAB1A, S100A8, S100A9, STK11, TMBIM6, TP53, UVRAG, VCP, XBP1, TFEB, SRPX, ULK1, BECN1, SQSTM1, USP13, HAP1, USP10, ATG5, NAPSA, TMEM59, ULK2, RUBCN, TBC1D5, RB1CC1, PLEKHM1, TECPR2, HDAC6, OPTN, RNF41, RGS19, ATG7, TM9SF1, WDR45, PARK7, GABARAPL2, SIRT2, ATG4B, VPS13A, CLEC16A, VPS39, TECPR1, CHMP2B, ULK3, PTPN22, VPS41, TMEM208, UBQLN2, NRBF2, SH3GLB1, TRIM17, RAB24, TOLLIP, RAB39A, FNBP1L, WIPI1, MAP1S, WDR41, DRAM1, SUPT20H, VPS11, UBQLN4, TIGAR, VPS18, PHF23, TBC1D17, ZKSCAN3, MAP1LC3B, VMP1, RAB1B, C19orf12, ATG10, EVA1A, WDR24, ATG4C, TRIM5, LRSAM1, RNF185, RAB39B, LRRK2, DRAM2, CHMP4B, SMCR8, VTI1A, RAB12, C9orf72, NHLRC1, BECN2, PGA3, PGA4</i> |
| epithelial to mesenchymal transition (GO:0001837) | <i>AMELX, BMP2, BMP7, CTNNB1, DDX5, FGFR2, FOXF2, GSK3B, HGF, HIF1A, HNRNPAB, RBPJ, LOXL2, NOTCH1, S100A4, SNAI2, SNAI1, SOX9, TGFB1, TGFB2, TGFB1, TGFB2, WNT5A, WNT11, HMGA2, DLG5, NOG, CUL7, TRIM28, DDX17, LEF1, WNT4, EPB41L5, FAM83D, LOXL3, RFLNB</i>                                                                                                                                                                                                                                                                                                                                                                                                                                                                                                                                                         |
| phosphatidylethanolamine binding (GO:0008429)     | <i>ANXA11, MFGE8, NF1, PEBP1, PLTP, PEMT, CD300A, ESYT2, MAP1LC3A</i>                                                                                                                                                                                                                                                                                                                                                                                                                                                                                                                                                                                                                                                                                                                                                 |

Table S2: PEB interactions with autophagy and EMT.

| Module | PEB             | Autophagy                                                                                                                                                                    | EMT                                                                                   |
|--------|-----------------|------------------------------------------------------------------------------------------------------------------------------------------------------------------------------|---------------------------------------------------------------------------------------|
| blue   | <i>ANXA11</i>   | <i>ANXA7, ATG4C, CLTC, FOXO1, HDAC6, IFI16, MAP1LC3B, MAP1S, PARK7, PHF23, RAB39A, RNF41, S100A9, SMCR8, SRPX, SUPT20H, TMEM208, TP53, VPS11, VPS18, VPS39, WDR45, WIPI1</i> | <i>BMP7, DDX17, DLG5, EPB41L5, FAM83D, HNRNPAB, LOXL2, LOXL3, SNAI2, TGFB1, WNT5A</i> |
|        | <i>CD300A</i>   | <i>HMGB1, PARK7, RGS19</i>                                                                                                                                                   | <i>DLG5</i>                                                                           |
|        | <i>ESYT2</i>    | <i>PTPN22, STK11, TM9SF1</i>                                                                                                                                                 |                                                                                       |
|        | <i>MAP1LC3A</i> | <i>MAP1S, NRBF2, PARK7, RAB39A, RNF41, SMCR8, SUPT20H, TIGAR, TMEM208, TRIM5, ULK2, VPS39</i>                                                                                | <i>SNAI2, TGFB1, TGFB2</i>                                                            |
|        | <i>MFGE8</i>    | <i>RAB39B, WDR24</i>                                                                                                                                                         | <i>NOG, TGFB2</i>                                                                     |
|        | <i>NF1</i>      | <i>NRBF2</i>                                                                                                                                                                 |                                                                                       |
|        | <i>PEBP1</i>    | <i>WDR45, WIPI1</i>                                                                                                                                                          |                                                                                       |
|        | <i>PEMT</i>     | <i>TMBIM6</i>                                                                                                                                                                |                                                                                       |
|        | <i>PLTP</i>     | <i>RNF41, SRPX, TRIM5, VPS39</i>                                                                                                                                             | <i>S100A4, SNAI2, TGFB1</i>                                                           |
| brown  | <i>ESYT2</i>    | <i>TECPR1</i>                                                                                                                                                                | <i>TGFBR1</i>                                                                         |
|        | <i>MAP1LC3A</i> | <i>NAPSA, PIK3C3, RAB1A, RAB8A, SIRT2, TFEB, ULK1</i>                                                                                                                        |                                                                                       |
|        | <i>MFGE8</i>    | <i>RAB12</i>                                                                                                                                                                 |                                                                                       |
|        | <i>NF1</i>      | <i>PIK3C3, RAB1A, TBC1D5, ZKSCAN3</i>                                                                                                                                        |                                                                                       |
|        | <i>PEBP1</i>    | <i>PIK3C3, PIK3CB, TBC1D25, TBC1D5, TOLLIP</i>                                                                                                                               | <i>TGFBR1</i>                                                                         |
|        | <i>PLTP</i>     | <i>RAB8A, RUBCN, SIRT2, TRIM17, ULK1</i>                                                                                                                                     |                                                                                       |
| yellow | <i>ANXA11</i>   | <i>GABARAPL2</i>                                                                                                                                                             | <i>GSK3B, WNT11</i>                                                                   |
|        | <i>PLTP</i>     |                                                                                                                                                                              | <i>WNT11</i>                                                                          |

Table S3: Summary of previously reported and novel RKIP/PEBP1 interactions.

| Category  | Evidence     | Gene                                                  |
|-----------|--------------|-------------------------------------------------------|
| Autophagy | coexpression | PARK7                                                 |
|           | novel        | PIK3C3, PIK3CB, TBC1D25, TBC1D5, TOLLIP, WDR45, WIPI1 |
|           | textmining   | TP53, PARK7, HMGB1                                    |
| EMT       | novel        | TGFBR1                                                |
|           | textmining   | CTNNB1, HMGA2                                         |
| PEB       | experiments  | NF1                                                   |
|           | textmining   | NF1                                                   |

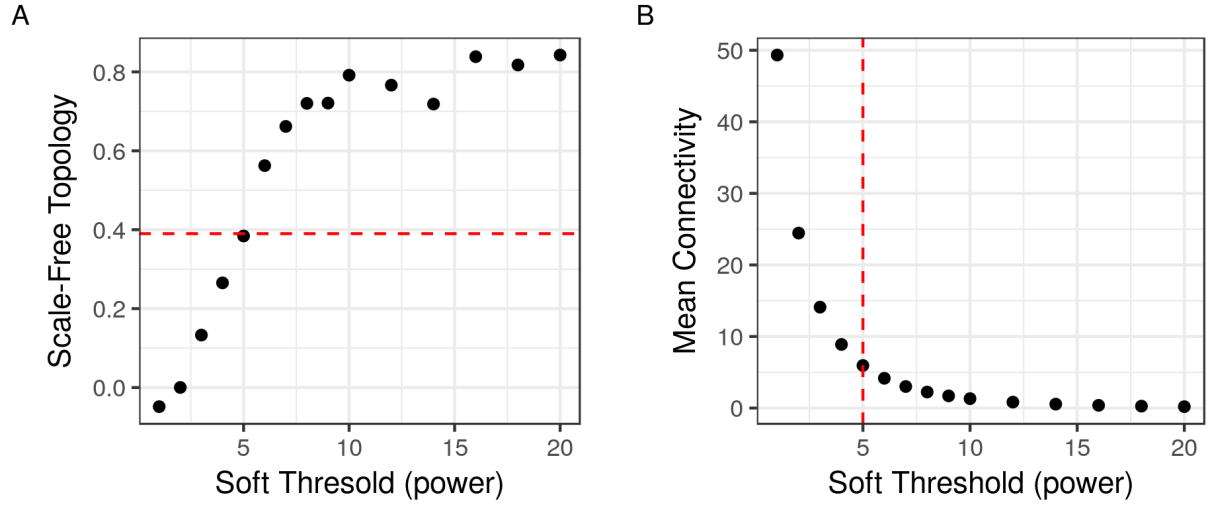

Figure S1: Scale free topology for multiple power values. For each power value, a scale free topology index was calculated. **(A)** The fit indices, the slopes multiplied by the R squared ( $R^2$ ) values, are shown as points for each power value. **(B)** The mean connectivity, average edges shared by a node, for the resultant network at each power value are shown as points. Red lines represent the choice of power that satisfies both high  $R^2$  values and high connectivity.

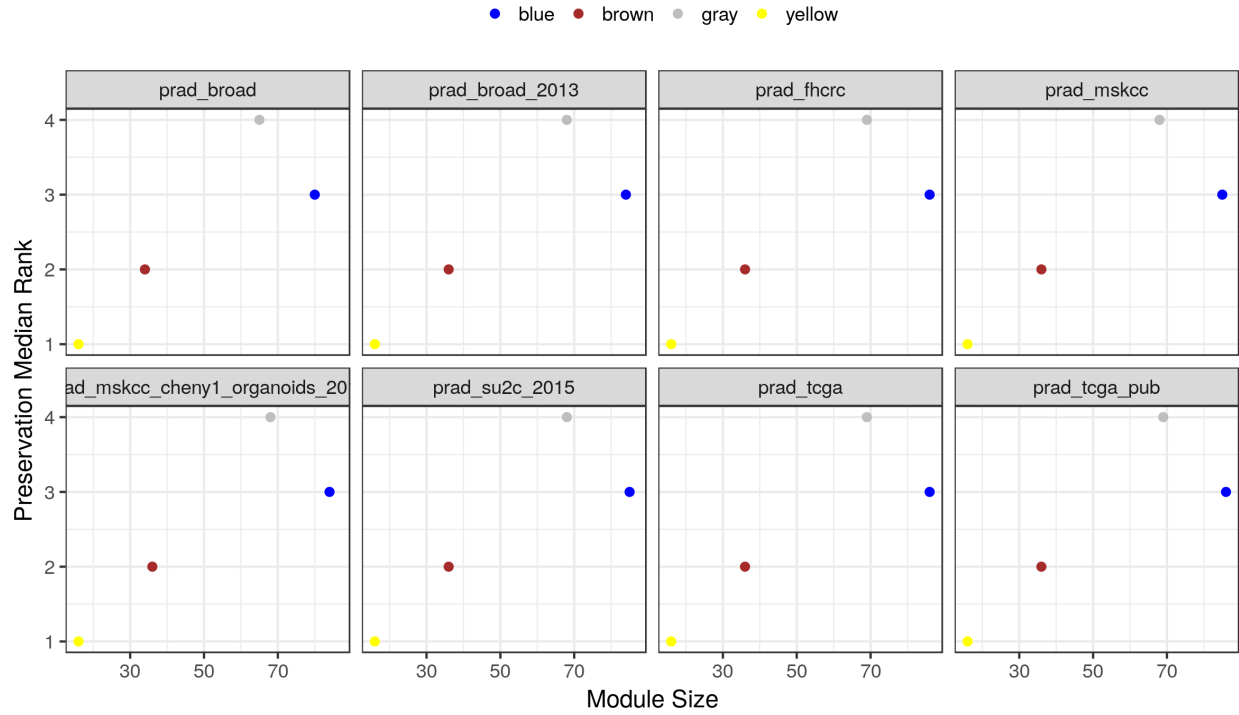

Figure S2: Module preservation ranks across multiple prostate cancer datasets. The GSE3325 dataset was used to detect the highly co-expressed modules among PEB, EMT and autophagy genes (87, *blue*; 37, *brown*; 18, *yellow*; and *gray*, randomly assigned). The detected modules were used as a reference to calculate several preservation statistics in eight independent datasets of prostate cancer. The median ranks of the preservation statistics and the sizes of four modules (*blue*, *brown* and *yellow*; *gray*, randomly assigned) are shown as colored points.

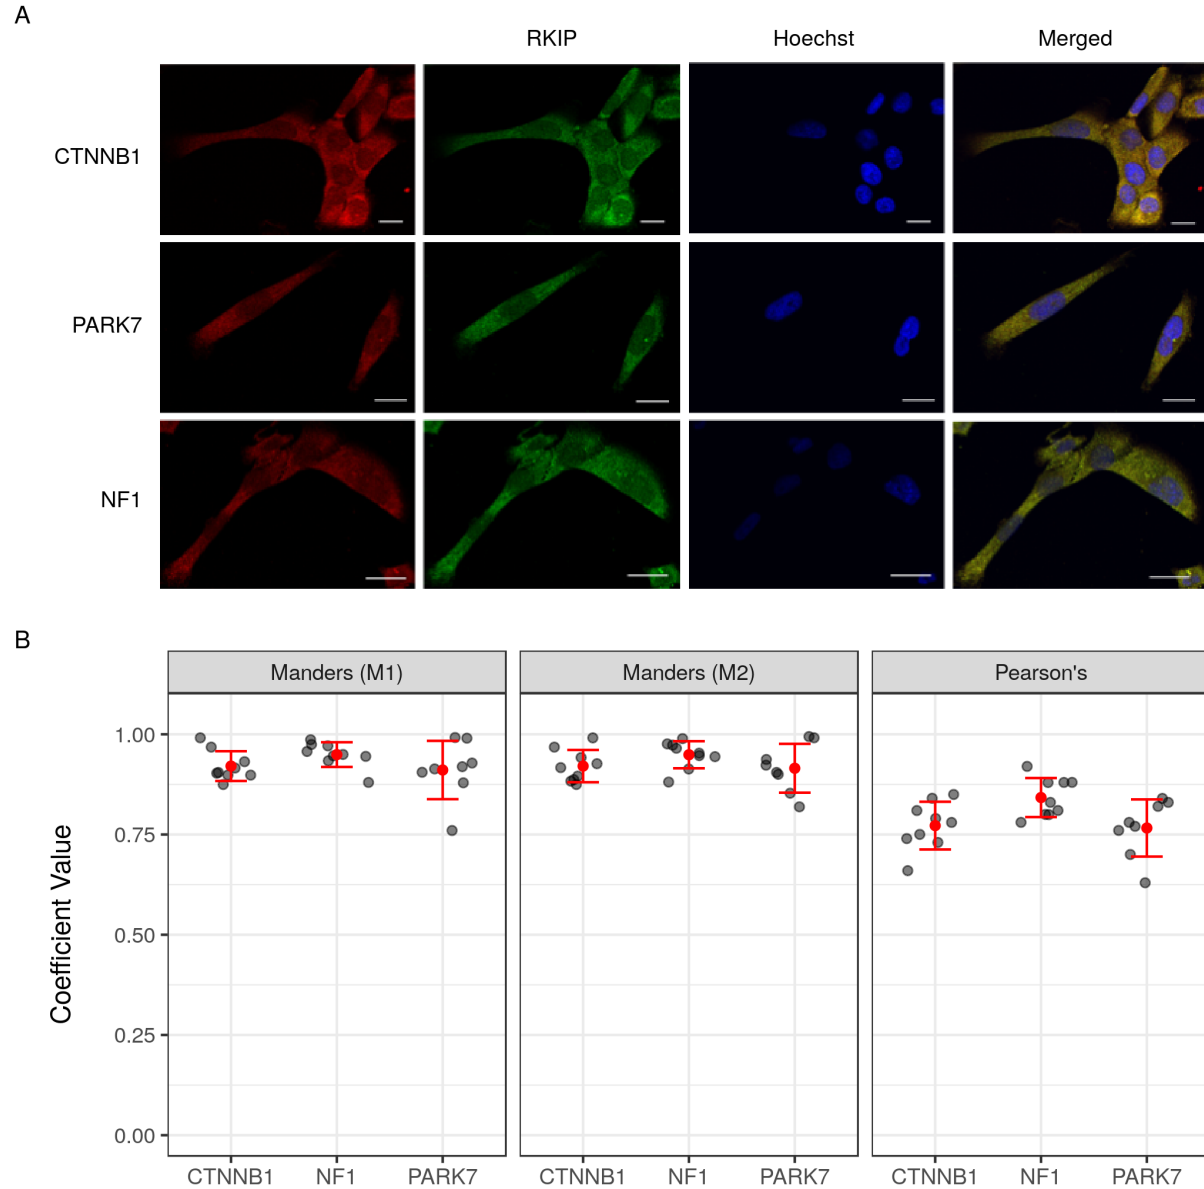

Figure S3: Co-localization of RKIP/PEBP1 with previously reported interacting proteins. **(A)** Immunohistochemistry. Co-localization images between RKIP/PEBP1 and autophagy gene products (CTNNB1, PARK7 and NF1) in human prostate cancer cell line DU145 were obtained from the confocal Olympus FV-1000 microscope (OLYMPUS CORPORATION, Japan). Scale, 10  $\mu$ m. Nucleus was stained by Hoechst. **(B)** Degree of co-localization between RKIP/PEBP1 and binding targets. The graphs (*left* two M1 and M2) represent the comparative mean Manders' coefficient. Manders' M1 and M2 values were taken above the auto-threshold of green or red channel, respectively. The graph (*right*) shows the Pearson's correlation coefficient of the co-localization targeted proteins. These values were calculated from variously selected ROIs (n=5 to 10).
